# Supplementary material for: Listening to Indigenous Voices, Interests, and Priorities That Would Inform Tribal Co-Management of Natural Resources on a California State University Forest
Source: MDPI journal article supplement (doi:10.3390/f13122165), 2022-12-17
Supplement: s1 [file s1]

Archive with 1 entries (1 files):
- forests-2066053-supplementary.pdf
