# Supplementary material for: Listening to Indigenous Voices, Interests, and Priorities That Would Inform Tribal Co-Management of Natural Resources on a California State University Forest
Source: MDPI journal article supplement (doi:10.3390/f13122165), 2022-12-17
Supplement: s1 [file s1 › forests-2066053-supplementary.pdf]

## **Table S1. Interview Guide**

### **Introduction**

What is your name?

### **Forest Management**

1. Could you please tell me about some of your first memories of being in the forest?
  - a. What, if at all, is your professional experience in natural resource management?
2. How do you define a healthy forest?
  - a. When walking in the forest, what are some indicators that you look for?
3. In your opinion, what are the biggest threats to a healthy forest?
  - a. What do you believe can be done to mitigate this?
4. What are your thoughts on forest management?
  - a. What are your thoughts on timber harvesting?
5. Foresters use the term “non timber forest products”, you could think of these as tribal cultural resources like basketry material or medicines, how does forest management influence these?

### **Co Management**

6. How can Cal Poly Humboldt and the Wiyot Tribe work together to manage this forest?
7. What makes a successful partnership/collaboration between tribes and universities/states/feds?
8. What types of expectations would you have for the university as a co-management partner?
  - a. Do you anticipate any barriers in the development of this relationship?
9. From your perspective, how can co-management of Goukdi’n benefit the Wiyot Tribe?
  - a. What types of impacts could co-management have on the Tribe?
10. What are your forest management goals within Goukdi’n?
  - a. How do these goals promote a healthy forest?
11. If we were transported 100 years into the future, and this forest was properly managed, what do you imagine it looking like?

### **Tribal Youth Engagement**

12. What are your thoughts on tribal youth being involved with forest management?
  - a. What are some barriers and how can we work around them?
  - b. Do you believe that it is important that tribal youth obtain college degrees in forestry or natural resource management?

### **Relationship to the forest**

13. How would you describe the relationship between the Wiyot Tribe and the forest?

### **Demographics**

14. Are you Native American?
15. Where do you work or who do you work for?
16. What is your gender identity?
17. What year were you born?
